# Supplementary material
Source: publisher site journal article supplement (https://www.dovepress.com/get_supplementary_file.php?f=247776.docx)
Supplement: Supplementary file 1 [file get_supplementary_file.php]

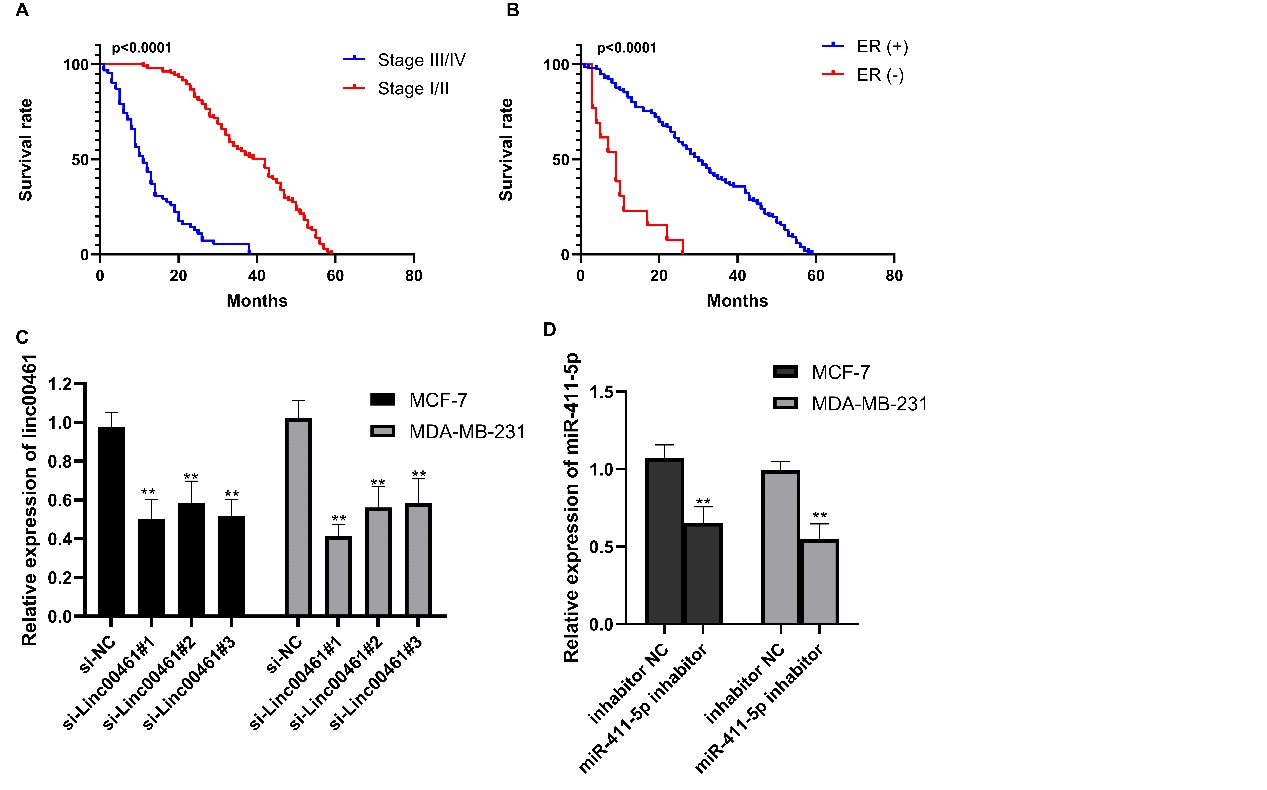


**Supplemental Figures** A Kaplan-Meier survival analysis was used to assess tumor stage and BC patients' overall survival. B Kaplan-Meier survival analysis was used to assess ER status and BC patients' overall survival. C LINC00461 expression in LINC00461 down-regulated MCF-7 and MDA-MB-231 cell lines. D miR-411-5p expression in miR-411-5p down-regulated MCF-7 and MDA-MB-231 cell lines. Data represent the mean ± SD. ***P* <0.01. The experiments were independently repeated at least three times.
